# Supplementary material
Source: bioRxiv or medRxiv preprint supplement (https://www.biorxiv.org/highwire/filestream/125474/field_highwire_adjunct_files/1/380998-2.pdf)
Supplement: Supplementary file [file 380998-2.pdf]

**Effect of *de novo* transcriptome assembly on transcript  
quantification**

**Additional File 1**

Table S1

*Parameter settings used when invoking the Flux Simulator*

|                 | Yeast     | Dog        | Mouse      |
|-----------------|-----------|------------|------------|
| NB_MOLECULES    | 5,000,000 | 35,000,000 | 85,000,000 |
| FRAGMENTATION   | YES       | YES        | YES        |
| FRAG_SUBTRATE   | RNA       | RNA        | RNA        |
| FRAG_METHOD     | UR        | UR         | UR         |
| RTRSCRIPTION    | YES       | YES        | YES        |
| RT_PRIMER       | RH        | RH         | RH         |
| FILTERING       | YES       | YES        | YES        |
| PCR_PROBABILITY | 0.05      | 0.05       | 0.05       |
| ERR_FILE        | 76        | 76         | 76         |
| PAIRED_END      | YES       | YES        | YES        |
| READ_LENGTH     | 150       | 150        | 150        |
| READ_NUMBER     | 3,000,000 | 21,000,000 | 50,000,000 |

Table S2

*Sequence Information of RNA-Seq Reads Used in This Study*

|                           | Experimental data |              |              |
|---------------------------|-------------------|--------------|--------------|
|                           | Yeast             | Dog          | Mouse        |
| No. of fragments          | 5,449,060         | 20,480,445   | 43,145,380   |
| <i>Max</i> read length    | 101               | 50           | 76           |
| Sequencing depth          | 118.0             | 33.2         | 44.5         |
| Insert size <i>mean</i> * | 204.6             | 150.5        | 289.8        |
| Insert size <i>SD</i> *   | 96.3              | 53.9         | 78.1         |
| Strand specificity        | Non-stranded      | Non-stranded | RF-stranded  |
|                           | Simulated data    |              |              |
|                           | Yeast             | Dog          | Mouse        |
| No. of fragments          | 1,212,904         | 8,464,764    | 20,209,629   |
| <i>Max</i> Read length    | 150               | 150          | 150          |
| Sequencing depth          | 33.5              | 32.1         | 33.1         |
| Insert size <i>mean</i> * | 193.8             | 194.0        | 194.1        |
| Insert size <i>SD</i> *   | 30.2              | 30.1         | 30.1         |
| Strand specificity        | Non-stranded      | Non-stranded | Non-stranded |

\* The mean and standard deviation of the insert sizes were estimated using Burrows-Wheeler Aligner.

Table S3

*Definitions of Contig Categories*

| Categories      | Definitions                                                                                                                                                                                                                                                                                                                                                                                                                                                                                                                                                                                                                                                                                          |
|-----------------|------------------------------------------------------------------------------------------------------------------------------------------------------------------------------------------------------------------------------------------------------------------------------------------------------------------------------------------------------------------------------------------------------------------------------------------------------------------------------------------------------------------------------------------------------------------------------------------------------------------------------------------------------------------------------------------------------|
| Full-length     | <ol style="list-style-type: none"> <li>1. Only <b>one</b> transcript assigned to the contig in interest.</li> <li>2. The corresponding transcript only assigned to the contig in interest.</li> <li>3. Both the contig and its corresponding transcript are <b>unique</b>.</li> <li>4. Both <i>recovery</i> and <i>accuracy</i> of the global alignment (<i>contig, transcript</i>) <math>\geq 0.90</math></li> <li>5. <math>-10\% \leq \text{difference in length of } (contig, transcript) \leq 10\%</math></li> </ol>                                                                                                                                                                             |
| Incompleteness  | <ol style="list-style-type: none"> <li>1. Only <b>one</b> transcript assigned to the contig in interest.</li> <li>2. The corresponding transcript only assigned to the contig in interest.</li> <li>3. Both the contig and its corresponding transcript are <b>unique</b>.</li> <li>4. The <i>accuracy</i> of the global alignment (<i>contig, transcript</i>) <math>\geq 0.90</math></li> <li>5. <i>Difference in length</i> of (<i>contig, transcript</i>) <math>&lt; -10\%</math></li> </ol>                                                                                                                                                                                                      |
| Over-extended   | <ol style="list-style-type: none"> <li>1. Only <b>one</b> transcript assigned to the contig in interest.</li> <li>2. The corresponding transcript only assigned to the contig in interest.</li> <li>3. Both the contig and its corresponding transcript are <b>unique</b>.</li> <li>4. The <i>recovery</i> of the global alignment (<i>contig, transcript</i>) <math>\geq 0.90</math></li> <li>5. <i>Difference in length</i> of (<i>contig, transcript</i>) <math>&gt; 10\%</math></li> </ol>                                                                                                                                                                                                       |
| Family-collapse | <ol style="list-style-type: none"> <li>1. All the transcripts that assigned to the contig in interest are in the same connected component.</li> <li>2. All the corresponding transcript only assigned to the contig in interest.</li> <li>3. The contig is <b>unique</b>.</li> <li>4. All the transcripts that assigned to the contig are <b>not unique</b>.</li> <li>5. There exists <b>at least one</b> global alignment (<i>contig, transcript</i>) that match the following criteria: <ol style="list-style-type: none"> <li>1. Both <i>recovery</i> and <i>accuracy</i> <math>\geq 0.90</math></li> <li>2. <math>-10\% \leq \text{difference in length} \leq 10\%</math></li> </ol> </li> </ol> |
| Duplication     | <ol style="list-style-type: none"> <li>1. Only <b>one</b> transcript assigned to the contig in interest.</li> <li>2. The corresponding transcript is assigned to multiple contigs which are in the same connected component.</li> <li>3. The contig is <b>not unique</b>.</li> <li>4. The corresponding transcript is <b>unique</b>.</li> <li>5. There exists <b>at least one</b> global alignment (<i>contig, transcript</i>) that match the following criteria: <ol style="list-style-type: none"> <li>1. Both <i>recovery</i> and <i>accuracy</i> <math>\geq 0.90</math></li> <li>2. <math>-10\% \leq \text{difference in length} \leq 10\%</math></li> </ol> </li> </ol>                         |

Table S4

*Biological Variability of Reference Transcripts.*

|                                       | Yeast     | Dog        | Mouse       |
|---------------------------------------|-----------|------------|-------------|
| No. of genes                          | 5,107     | 18,045     | 21,510      |
| No. of transcripts                    | 5,107     | 23,078     | 56,706      |
| No. of genes w/ single transcript     | 5,107     | 13,713     | 8,071       |
| No. of transcripts per gene           | 1.000     | 1.279      | 2.636       |
| Max number of transcripts for a gene  | 1         | 7          | 47          |
| No. of unique transcripts             | 4,806     | 15,299     | 16,134      |
| No. of connected components           | 4,893     | 18,881     | 27,940      |
| Connected components size <i>mean</i> | 1.044     | 1.222      | 2.030       |
| Connected components size <i>max</i>  | 62        | 26         | 163         |
| Maximum length                        | 14,733    | 105,543    | 123,179     |
| Total length                          | 8,512,860 | 62,014,091 | 143,577,796 |
| Average length                        | 1,666.90  | 2,687.15   | 2,531.97    |
| N50                                   | 1,944     | 3,776      | 3,523       |

Table S5

*Basic Statistics for Assembled Contigs*

| Dataset      |       | Assembly   | No. of contigs | No. of unique contigs | No. of connected component | Connected component size <i>mean</i> | Connected component size <i>max</i> | Contigs N50 |
|--------------|-------|------------|----------------|-----------------------|----------------------------|--------------------------------------|-------------------------------------|-------------|
| Simulated    | Yeast | rnaSPades  | 5,620          | 5,550                 | 5,582                      | 1.007                                | 4                                   | 1,575       |
|              |       | TransABySS | 5,443          | 5,264                 | 5,325                      | 1.022                                | 9                                   | 1,652       |
|              |       | Trinity    | 5,440          | 5,268                 | 5,335                      | 1.020                                | 7                                   | 1,711       |
|              | Dog   | rnaSPades  | 12,189         | 11,736                | 11,953                     | 1.020                                | 7                                   | 2,797       |
|              |       | TransABySS | 14,239         | 11,030                | 12,177                     | 1.169                                | 30                                  | 2,687       |
|              |       | Trinity    | 14,922         | 11,729                | 12,872                     | 1.159                                | 42                                  | 3,108       |
|              | Mouse | rnaSPades  | 12,592         | 10,866                | 11,689                     | 1.077                                | 6                                   | 3,148       |
|              |       | TransABySS | 17,162         | 10,055                | 12,260                     | 1.400                                | 22                                  | 2,756       |
|              |       | Trinity    | 16,320         | 10,276                | 12,423                     | 1.314                                | 24                                  | 3,295       |
| Experimental | Yeast | rnaSPades  | 4,776          | 4,434                 | 4,588                      | 1.041                                | 12                                  | 2,652       |
|              |       | TransABySS | 5,890          | 3,776                 | 4,579                      | 1.286                                | 9                                   | 2,632       |
|              |       | Trinity    | 5,506          | 4,143                 | 4,704                      | 1.170                                | 22                                  | 2,634       |
|              | Dog   | rnaSPades  | 22,397         | 20,027                | 21,136                     | 1.060                                | 11                                  | 2,403       |
|              |       | TransABySS | 21,359         | 14,846                | 17,493                     | 1.221                                | 13                                  | 2,181       |
|              |       | Trinity    | 21,607         | 17,652                | 19,278                     | 1.121                                | 21                                  | 2,141       |
|              | Mouse | rnaSPades  | 24,522         | 18,064                | 20,792                     | 1.179                                | 18                                  | 3,186       |
|              |       | TransABySS | 37,840         | 15,511                | 21,995                     | 1.720                                | 24                                  | 2,413       |
|              |       | Trinity    | 39,060         | 17,009                | 23,347                     | 1.673                                | 44                                  | 3,051       |

Table S6

*Number of Contigs for Contig Categories*

| Dataset      |       | Assembly    | Full-length | Over-extension | Incompleteness | Family-collapse | Duplication |
|--------------|-------|-------------|-------------|----------------|----------------|-----------------|-------------|
| Simulated    | Yeast | rnaSPades   | 2,831       | 11             | 564            | 52              | 15          |
|              |       | TransABBySS | 3,175       | 5              | 482            | 43              | 69          |
|              |       | Trinity     | 3,306       | 5              | 382            | 51              | 34          |
|              | Dog   | rnaSPades   | 3,546       | 70             | 827            | 1,469           | 22          |
|              |       | TransABBySS | 3,340       | 36             | 868            | 1,056           | 460         |
|              |       | Trinity     | 3,402       | 61             | 944            | 1,090           | 288         |
|              | Mouse | rnaSPades   | 1,638       | 98             | 253            | 3,076           | 14          |
|              |       | TransABBySS | 1,492       | 71             | 293            | 2,288           | 339         |
|              |       | Trinity     | 1,597       | 92             | 287            | 2,431           | 142         |
| Experimental | Yeast | rnaSPades   | 689         | 1,151          | 132            | 7               | 13          |
|              |       | TransABBySS | 657         | 868            | 153            | 5               | 229         |
|              |       | Trinity     | 525         | 1,067          | 141            | 5               | 119         |
|              | Dog   | rnaSPades   | 441         | 1,385          | 2,077          | 209             | 120         |
|              |       | TransABBySS | 320         | 804            | 1,832          | 145             | 348         |
|              |       | Trinity     | 368         | 973            | 1,963          | 149             | 148         |
|              | Mouse | rnaSPades   | 1,544       | 231            | 585            | 2,353           | 626         |
|              |       | TransABBySS | 972         | 84             | 545            | 988             | 2,813       |
|              |       | Trinity     | 1,176       | 111            | 585            | 1,103           | 1,733       |
